# Supplementary material for: Vibrational and Thermodynamic Properties of Hydrous Iron-Bearing Lowermost Mantle Minerals
Source: MDPI journal article supplement (doi:10.3390/min11080885), 2021-08-16
Supplement: s1 [file s1]

*Supplementary Material for:*

## **Vibrational and Thermodynamic Properties of Hydrous Iron-Bearing Lowermost Mantle Minerals**

**Jiajun Jiang <sup>1,2</sup>, Joshua M.R. Muir <sup>2</sup> and Feiwu Zhang <sup>2,\*</sup>**

<sup>1</sup> Faculty of Land Resources Engineering, Kunming University of Science and Technology, Kunming 650093, China; jiangjiajun@kust.edu.cn

<sup>2</sup> State Key Laboratory of Ore Deposit Geochemistry, Institute of Geochemistry, Chinese Academy of Sciences, Guiyang 550081, China; j.m.r.muir@mail.gyig.ac.cn

\* Correspondence: zhangfeiwu@vip.gyig.ac.cn

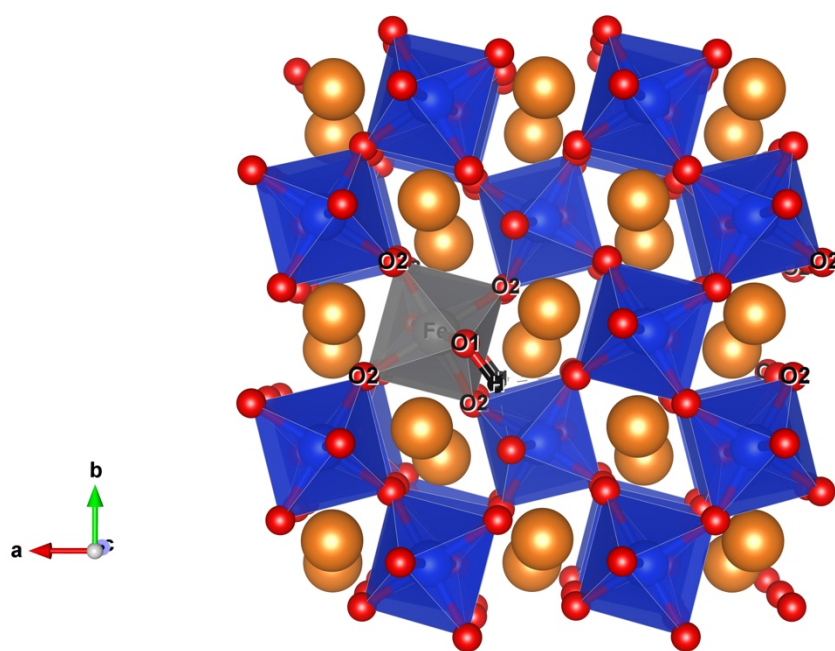

**Figure S1.** Crystal structures in details of  $[\text{Fe}^{3+}\text{-H}]_{\text{Si}}\text{-Brg}$ . In lattice structure, orange, dark blue, red, gray and black spheres represent magnesium, silicon, oxygen, iron and hydrogen, respectively.

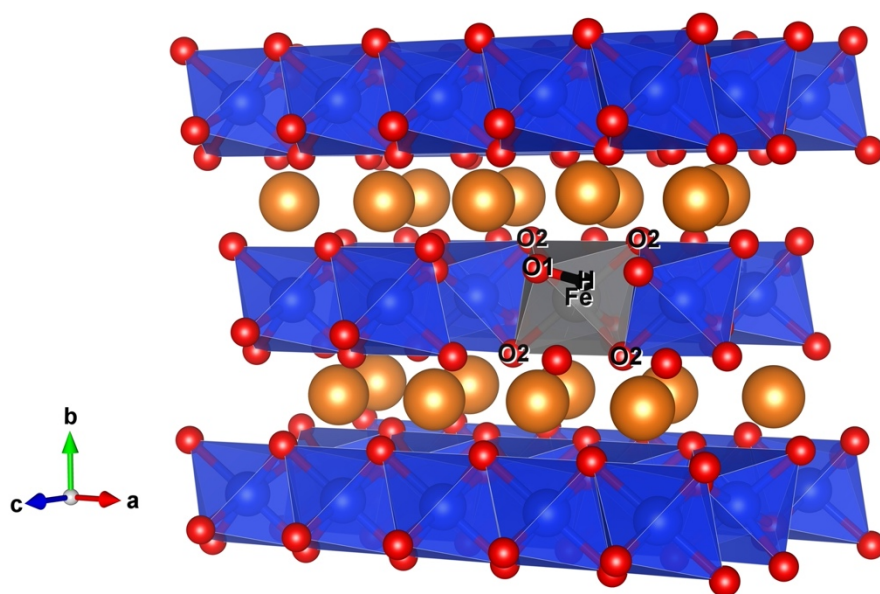

**Figure S2.** Crystal structures in details of  $[\text{Fe}^{3+}\text{-H}]_{\text{Si}}\text{-PPv}$ . In lattice structure, orange, dark blue, red, gray and black spheres represent magnesium, silicon, oxygen, iron and hydrogen, respectively.

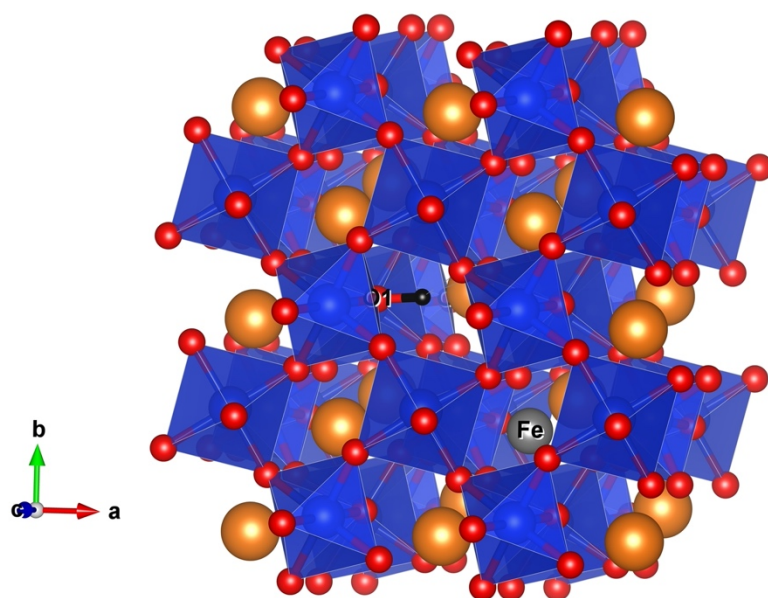

**Figure S3.** Crystal structures in details of  $[\text{Fe}^{3+}\text{-H}]_{\text{Mg-Mg-Brg}}$ . In lattice structure, orange, dark blue, red, gray and black spheres represent magnesium, silicon, oxygen, iron and hydrogen, respectively.

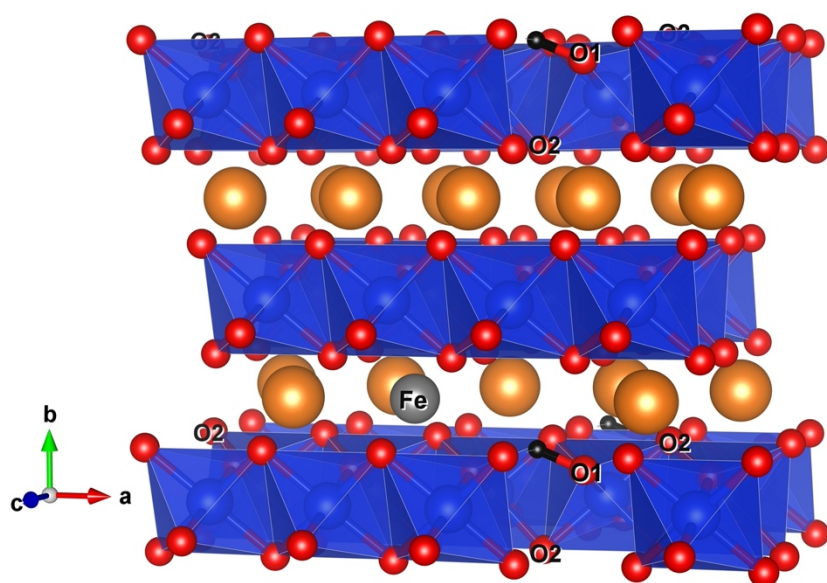

**Figure S4.** Crystal structures in details of  $[\text{Fe}^{3+}\text{-H}]\text{Mg-Mg-PPV}$ . In lattice structure, orange, dark blue, red, gray and black spheres represent magnesium, silicon, oxygen, iron and hydrogen, respectively.

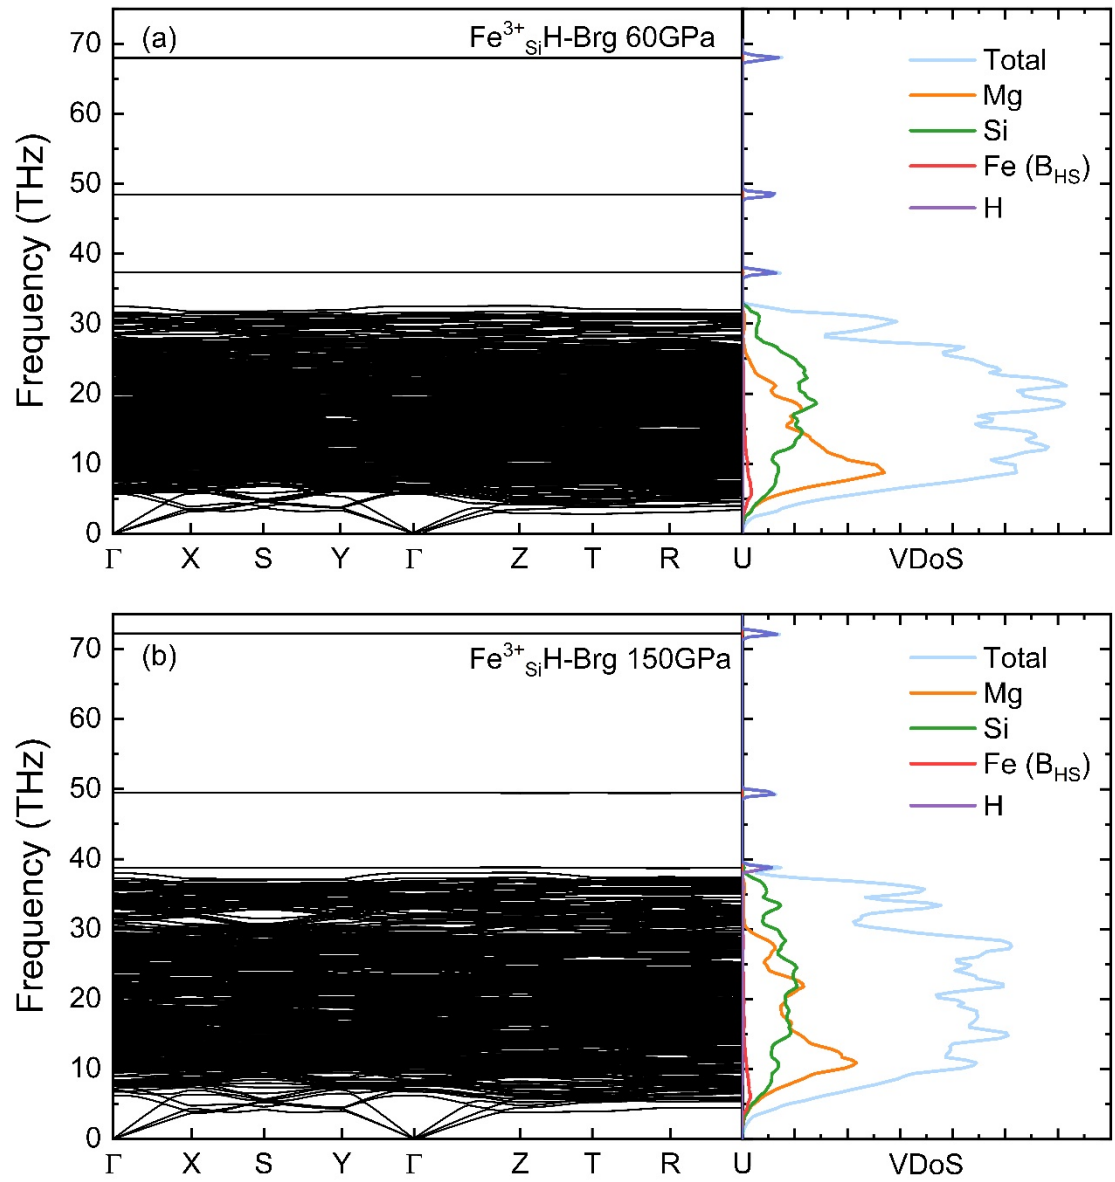

**Figure S5.** Phonon dispersion curves and vibrational density of states (VDoS) of  $[\text{Fe}^{3+}\text{-H}]_{\text{Si}}\text{-Brg}$  with HS  $\text{Fe}^{3+}$  at 60 GPa (a) and 150 GPa (b).  $B_{\text{HS}}$  indicates that the high spin  $\text{Fe}^{3+}$  in B site (Si site). Total VDoS and partial VDoS of Mg, Si, Fe (HS), H are shown by light blue, orange, green, red and purple, respectively.

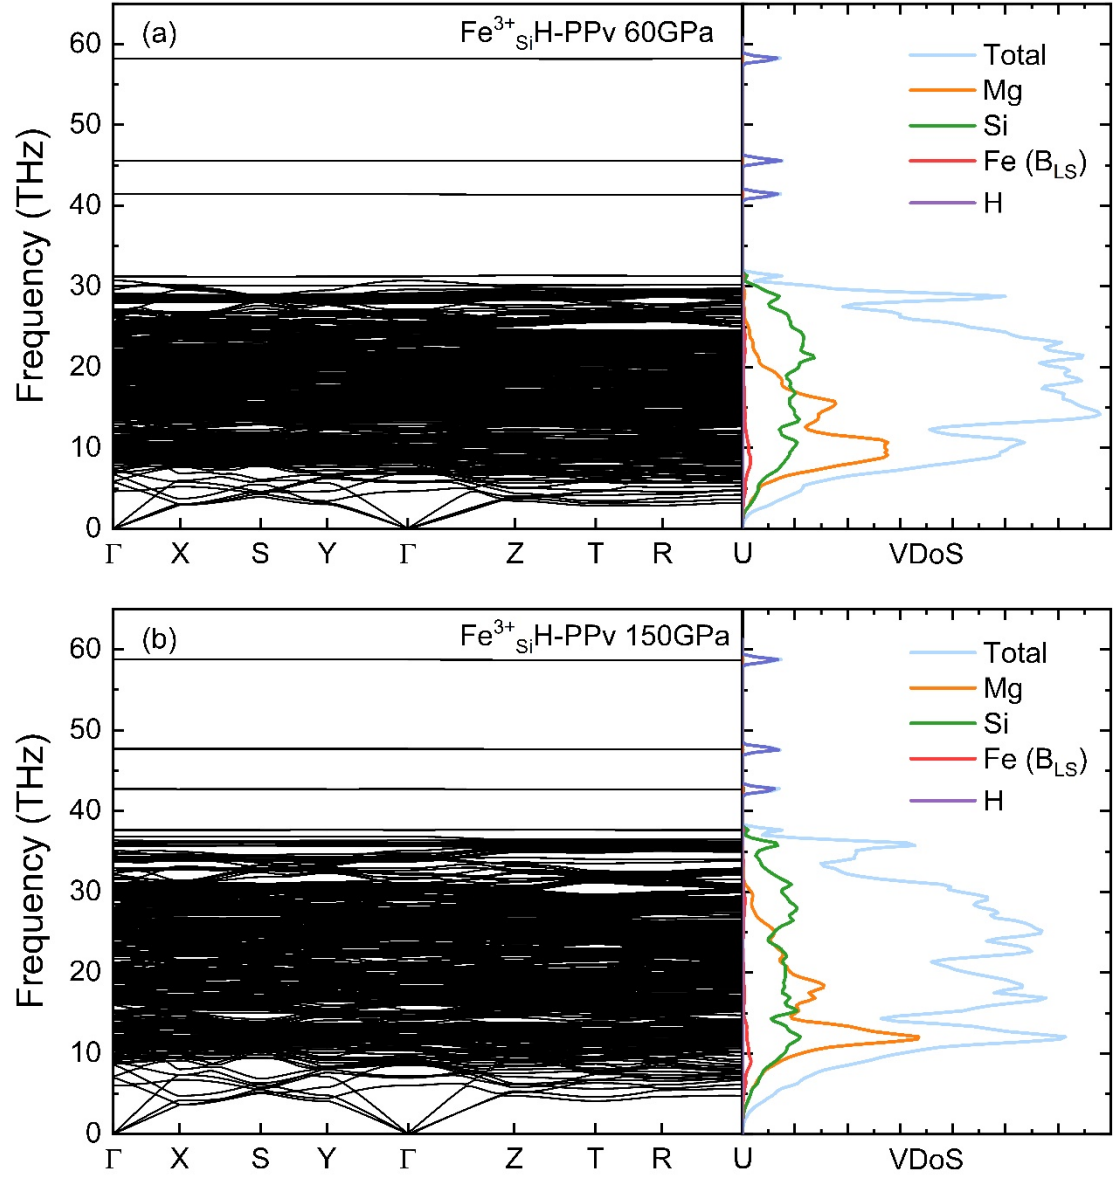

**Figure S6.** Phonon dispersion curves and vibrational density of states (VDoS) of  $[\text{Fe}^{3+}\text{-H}]_{\text{Si}}\text{-PPv}$  with LS  $\text{Fe}^{3+}$  at 60 GPa (a) and 150 GPa (b).  $\text{B}_{\text{LS}}$  indicates that the low spin  $\text{Fe}^{3+}$  in B site (Si site). Total VDoS and partial VDoS of Mg, Si, Fe (LS), H are shown by light blue, orange, green, red and purple, respectively.

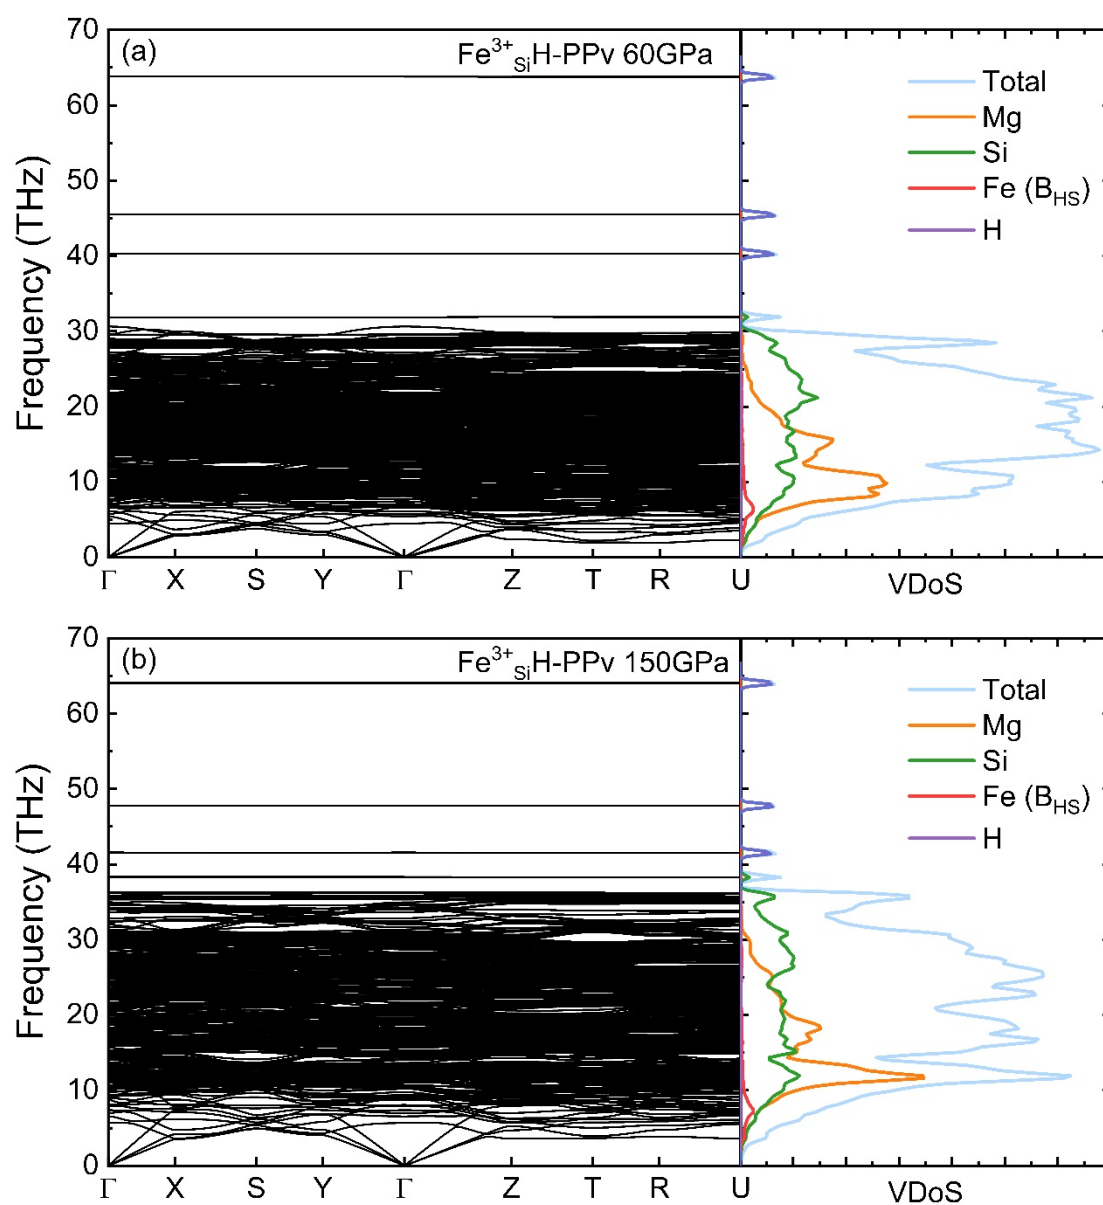

**Figure S7.** Phonon dispersion curves and vibrational density of states (VDoS) of  $[\text{Fe}^{3+}\text{-H}]_{\text{Si}}\text{-PPv}$  with HS  $\text{Fe}^{3+}$  at 60 GPa (a) and 150 GPa (b).  $B_{\text{HS}}$  indicates that the high spin  $\text{Fe}^{3+}$  in B site (Si site). Total VDoS and partial VDoS of Mg, Si, Fe (HS), H are shown by light blue, orange, green, red and purple, respectively.



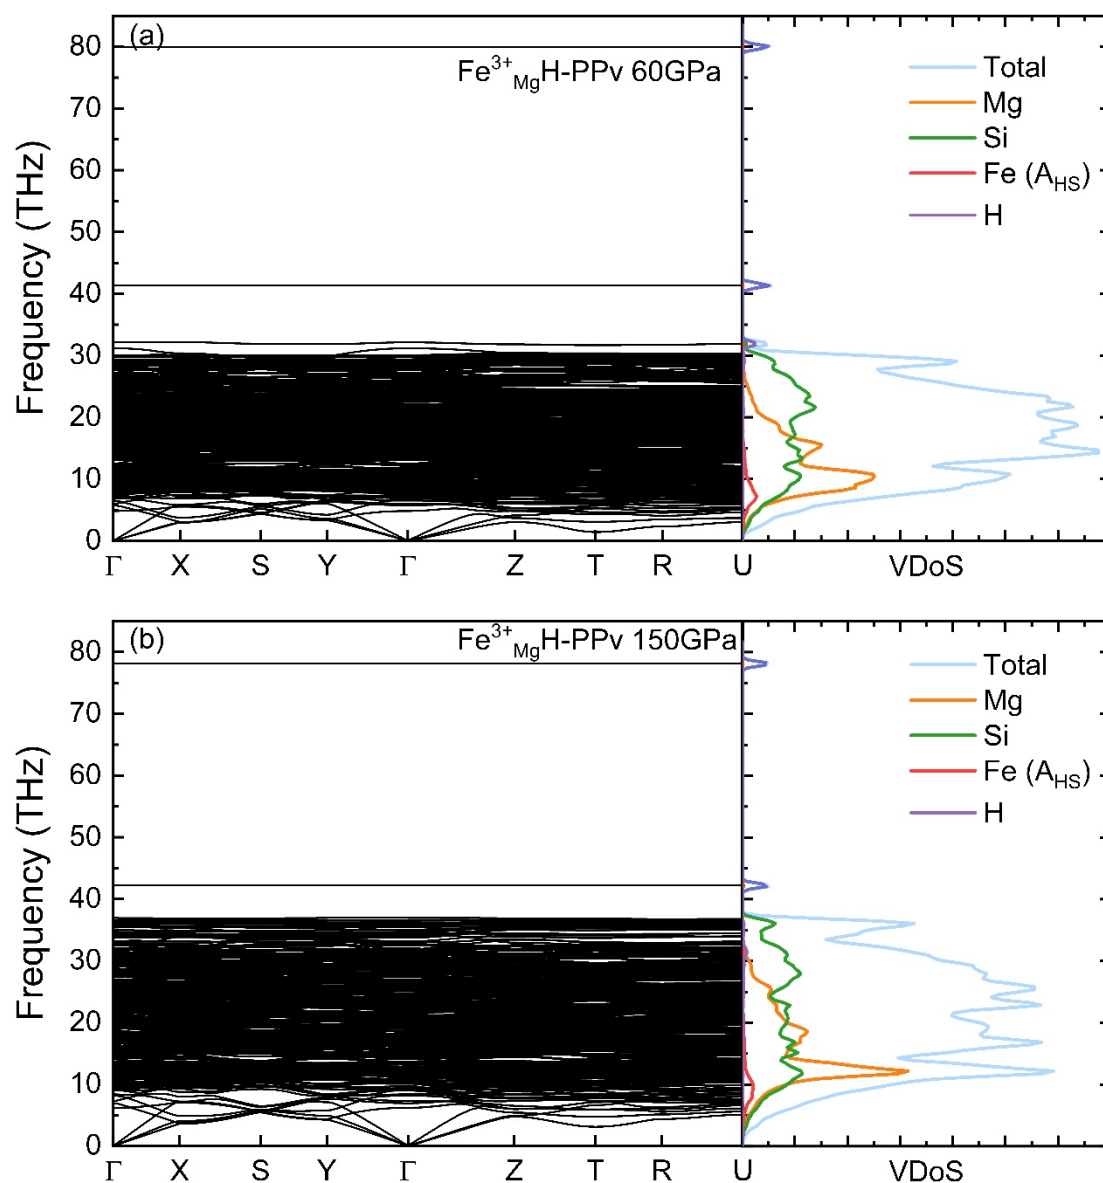

**Figure S8.** Phonon dispersion curves and vibrational density of states (VDoS) of  $[\text{Fe}^{3+}\text{-H}]_{\text{Mg-Mg-PPv}}$  at 60 GPa (a) and 150 GPa (b).  $A_{\text{HS}}$  indicates that the high spin  $\text{Fe}^{3+}$  in A site (Mg site). Total VDoS and partial VDoS of Mg, Si, Fe (HS), H are shown by light blue, orange, green, red and purple, respectively.

**Table S1.** Calculated thermodynamic parameters of hydrous iron-bearing and pure structure for bridgmanite\*

|                                             | 90 GPa |       |       |       | 120 GPa |       |       |       | 150 GPa |       |       |       |
|---------------------------------------------|--------|-------|-------|-------|---------|-------|-------|-------|---------|-------|-------|-------|
|                                             | 300K   | 1000K | 2000K | 3000K | 300K    | 1000K | 2000K | 3000K | 300K    | 1000K | 2000K | 3000K |
| $K_T$ (GPa)                                 | 534.1  | 518.5 | 493.9 | 467.5 | 628.2   | 614.6 | 593.1 | 570.2 | 714.8   | 703.3 | 685.2 | 665.7 |
|                                             | 536.9  | 520.6 | 495.1 | 468.4 | 632.1   | 617.8 | 595.1 | 571.2 | 719.8   | 707.7 | 688.1 | 667.3 |
|                                             | 540.1  | 525.8 | 502.4 | 476.9 | 630.2   | 619.6 | 601.3 | 580.9 | 709.5   | 702.9 | 690.4 | 675.5 |
| $\alpha$ ( $10^{-5}$ K $^{-1}$ )            | 0.74   | 1.38  | 1.53  | 1.63  | 0.60    | 1.17  | 1.29  | 1.35  | 0.51    | 1.04  | 1.14  | 1.18  |
|                                             | 0.71   | 1.36  | 1.51  | 1.61  | 0.56    | 1.14  | 1.26  | 1.32  | 0.47    | 1.00  | 1.10  | 1.14  |
|                                             | 0.69   | 1.34  | 1.48  | 1.57  | 0.58    | 1.16  | 1.26  | 1.31  | 0.53    | 1.07  | 1.15  | 1.17  |
| $C_P$ (J mol $^{-1}$ K $^{-1}$ )            | 64.4   | 118.9 | 128.7 | 133.1 | 60.2    | 117.4 | 127.4 | 131.3 | 56.7    | 116.1 | 126.5 | 130.2 |
|                                             | 63.1   | 117.3 | 126.9 | 131.2 | 59.0    | 115.7 | 125.6 | 129.4 | 55.6    | 114.4 | 124.7 | 128.2 |
|                                             | 63.3   | 117.7 | 127.0 | 131.1 | 59.1    | 116.2 | 125.9 | 129.5 | 55.6    | 115.0 | 125.2 | 128.7 |
| $\gamma$                                    | 1.23   | 1.25  | 1.26  | 1.28  | 1.18    | 1.20  | 1.21  | 1.22  | 1.15    | 1.18  | 1.18  | 1.18  |
|                                             | 1.20   | 1.23  | 1.25  | 1.26  | 1.13    | 1.17  | 1.18  | 1.19  | 1.10    | 1.14  | 1.14  | 1.15  |
|                                             | 1.17   | 1.23  | 1.25  | 1.26  | 1.17    | 1.20  | 1.21  | 1.21  | 1.23    | 1.21  | 1.20  | 1.20  |
| $S_{\text{vib}}$ (J mol $^{-1}$ K $^{-1}$ ) | 38.6   | 153.0 | 236.2 | 286.7 | 35.5    | 147.4 | 230.6 | 281.0 | 32.4    | 141.4 | 224.2 | 274.5 |
|                                             | 38.2   | 151.6 | 234.2 | 284.0 | 34.5    | 144.8 | 226.9 | 276.7 | 31.7    | 139.1 | 220.9 | 270.5 |
|                                             | 37.5   | 151.4 | 234.2 | 284.1 | 33.8    | 144.5 | 226.8 | 276.6 | 31.3    | 141.7 | 223.7 | 273.4 |

\*Values in the first, second and third lines in each thermodynamic parameter are for [Fe $^{3+}$ -H]<sub>Si</sub>-Brg, [Fe $^{3+}$ -H]<sub>Mg-Mg</sub>-Brg and pure-Brg, respectively.

**Table S2.** Calculated thermodynamic parameters of hydrous iron-bearing and pure structure for post-perovskite\*

|                                             | 90 GPa |       |       |       | 120 GPa |       |       |       | 150 GPa |       |       |       |
|---------------------------------------------|--------|-------|-------|-------|---------|-------|-------|-------|---------|-------|-------|-------|
|                                             | 300K   | 1000K | 2000K | 3000K | 300K    | 1000K | 2000K | 3000K | 300K    | 1000K | 2000K | 3000K |
| $K_T$ (GPa)                                 | 529.5  | 512.2 | 485.7 | 458.2 | 630.1   | 614.7 | 590.7 | 565.7 | 723.4   | 709.9 | 688.6 | 666.3 |
|                                             | 527.9  | 511.0 | 485.1 | 458.5 | 632.8   | 617.4 | 593.4 | 568.7 | 731.9   | 718.0 | 696.3 | 673.6 |
|                                             | 532.9  | 517.1 | 492.3 | 466.1 | 629.0   | 616.0 | 595.1 | 572.7 | 714.3   | 704.3 | 687.8 | 669.6 |
| $\alpha$ ( $10^{-5}$ K $^{-1}$ )            | 0.76   | 1.42  | 1.58  | 1.68  | 0.59    | 1.18  | 1.31  | 1.38  | 0.49    | 1.03  | 1.14  | 1.18  |
|                                             | 0.74   | 1.39  | 1.54  | 1.64  | 0.57    | 1.15  | 1.27  | 1.34  | 0.47    | 1.00  | 1.10  | 1.15  |
|                                             | 0.72   | 1.38  | 1.53  | 1.62  | 0.58    | 1.17  | 1.28  | 1.34  | 0.51    | 1.05  | 1.15  | 1.18  |
| $C_P$ (J mol $^{-1}$ K $^{-1}$ )            | 63.7   | 119.2 | 128.7 | 133.4 | 59.4    | 117.6 | 127.5 | 131.4 | 55.8    | 116.3 | 126.6 | 130.2 |
|                                             | 62.3   | 117.4 | 127.0 | 131.2 | 58.1    | 115.9 | 125.7 | 129.4 | 54.7    | 114.6 | 124.8 | 128.3 |
|                                             | 62.6   | 117.9 | 127.1 | 131.3 | 58.2    | 116.4 | 125.9 | 129.6 | 54.7    | 115.1 | 125.2 | 128.7 |
| $\gamma$                                    | 1.24   | 1.25  | 1.26  | 1.28  | 1.17    | 1.19  | 1.20  | 1.21  | 1.13    | 1.16  | 1.17  | 1.17  |
|                                             | 1.21   | 1.22  | 1.23  | 1.24  | 1.15    | 1.17  | 1.18  | 1.19  | 1.12    | 1.14  | 1.15  | 1.16  |
|                                             | 1.19   | 1.23  | 1.24  | 1.26  | 1.15    | 1.19  | 1.20  | 1.20  | 1.17    | 1.18  | 1.18  | 1.18  |
| $S_{\text{vib}}$ (J mol $^{-1}$ K $^{-1}$ ) | 37.1   | 152.3 | 236.1 | 286.7 | 33.3    | 145.2 | 228.5 | 279.0 | 30.4    | 139.3 | 222.3 | 272.6 |
|                                             | 36.2   | 149.5 | 232.2 | 282.0 | 32.5    | 142.6 | 224.9 | 274.6 | 29.7    | 137.0 | 218.8 | 268.5 |
|                                             | 35.1   | 149.1 | 232.0 | 281.9 | 31.5    | 142.2 | 224.6 | 274.4 | 29.1    | 136.9 | 222.1 | 271.8 |

\*Values in the first, second and third lines in each thermodynamic parameter are for [Fe<sup>3+</sup>-H]<sub>Si</sub>-PPv, [Fe<sup>3+</sup>-H]<sub>Mg-Mg</sub>-PPv and pure-PPv, respectively.

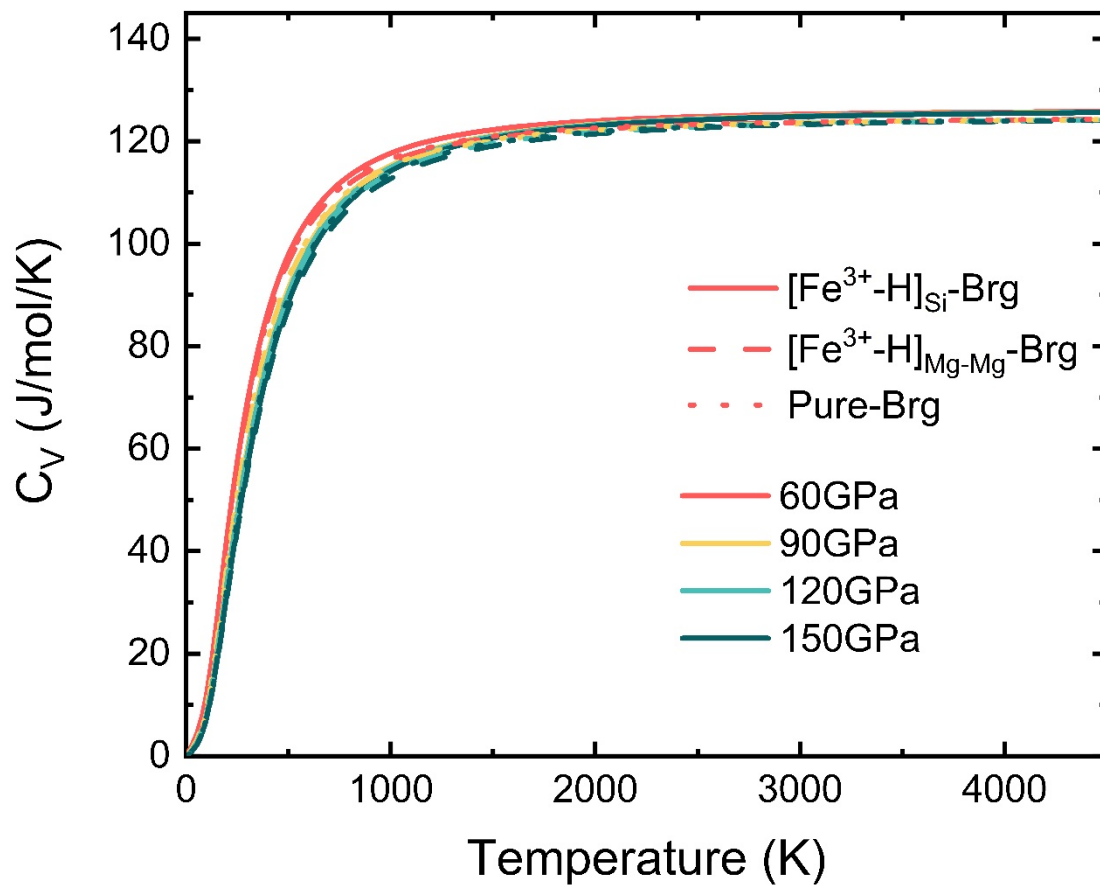

**Figure S9.** The heat capacity at constant volume as a function of temperature at different pressures. Solid, dashed and dotted lines represent the  $[\text{Fe}^{3+}\text{-H}]_{\text{Si-Brg}}$ ,  $[\text{Fe}^{3+}\text{-H}]_{\text{Mg-Mg-Brg}}$  and Pure-Brg, respectively.

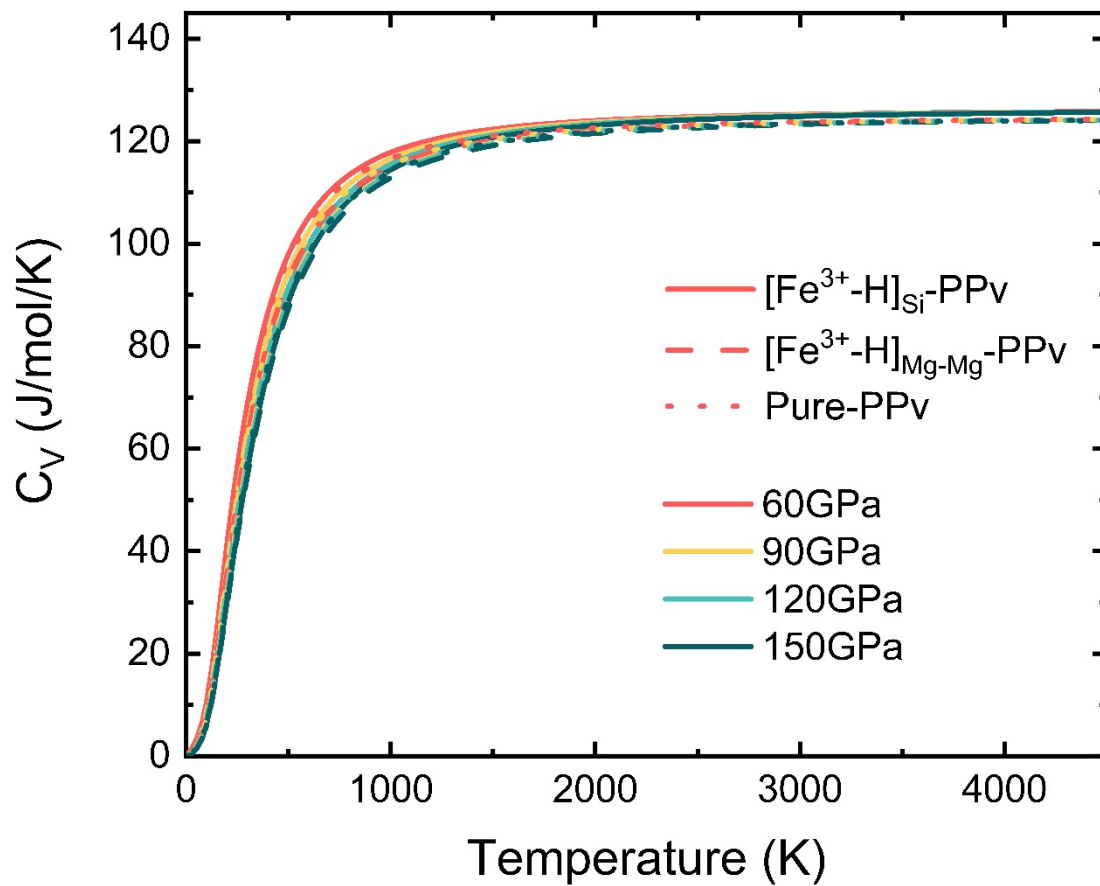

**Figure S10.** The heat capacity at constant volume as a function of temperature at different pressures. Solid, dashed and dotted lines represent the  $[\text{Fe}^{3+}\text{-H}]_{\text{Si}}\text{-PPv}$ ,  $[\text{Fe}^{3+}\text{-H}]_{\text{Mg-Mg}}\text{-PPv}$  and Pure-PPv, respectively.

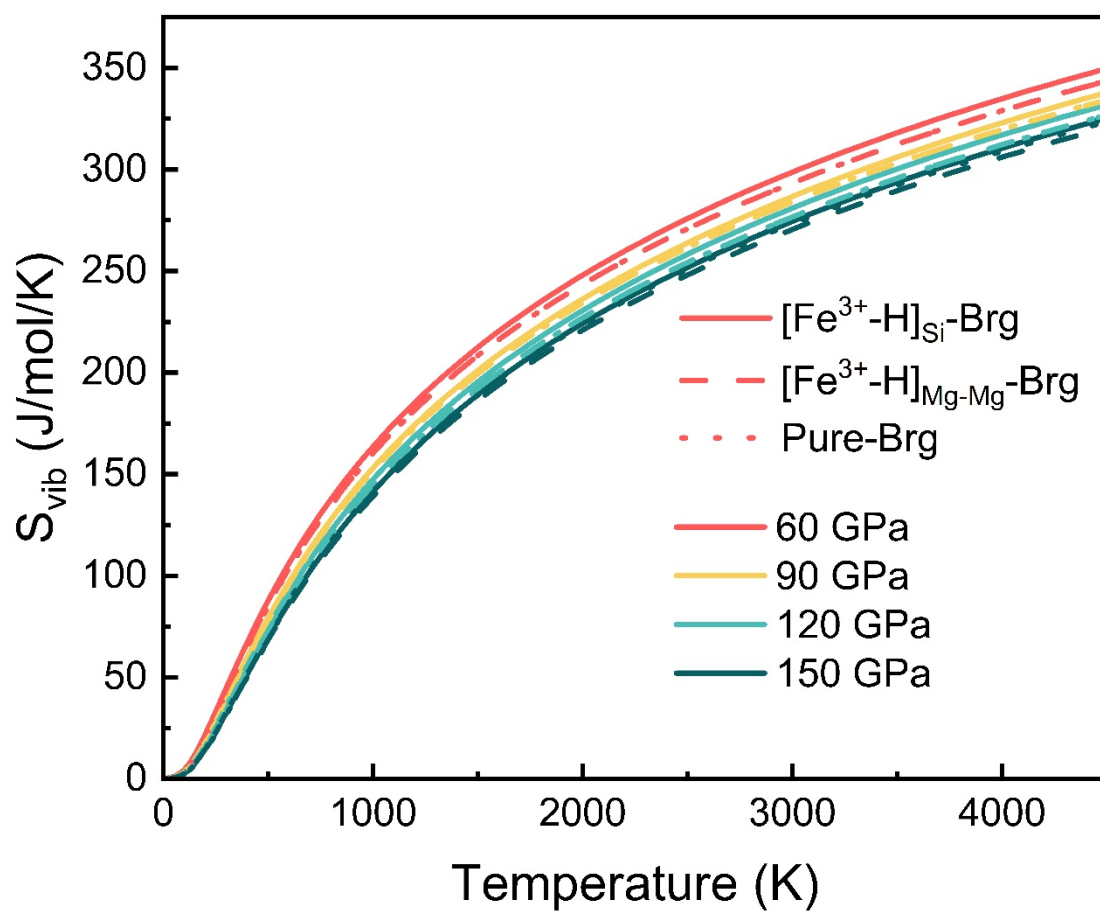

**Figure S11.** Temperature dependence of vibrational entropy at different pressures. Solid, dashed and dotted lines represent the  $[\text{Fe}^{3+}\text{-H}]_{\text{Si-Brg}}$ ,  $[\text{Fe}^{3+}\text{-H}]_{\text{Mg-Mg-Brg}}$  and Pure-Brg, respectively.

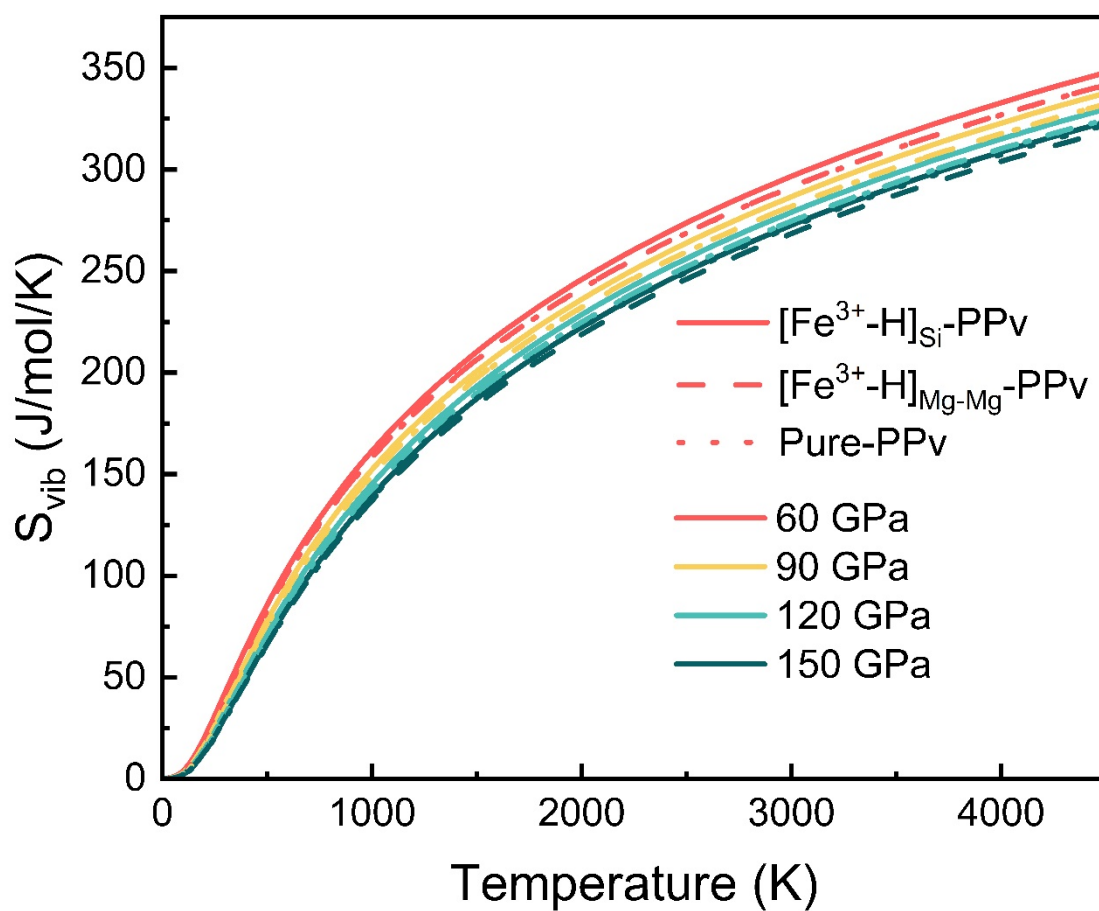

**Figure S12.** Temperature dependence of vibrational entropy at different pressures. Solid, dashed and dotted lines represent the  $[\text{Fe}^{3+}\text{-H}]_{\text{Si}}\text{-PPv}$ ,  $[\text{Fe}^{3+}\text{-H}]_{\text{Mg-Mg}}\text{-PPv}$  and Pure-PPv, respectively.
